# Supplementary material for: Matrix-assisted laser desorption/ionization mass spectrometric analysis of herbicides in dication-containing organic crystals
Source: Royal Society of Chemistry journal article supplement (doi:10.1039/c2ay26072g), 2012-01-01
Supplement: c2ay26072g.pdf [file c2ay26072g.pdf]

## SUPPORTING MATERIALS

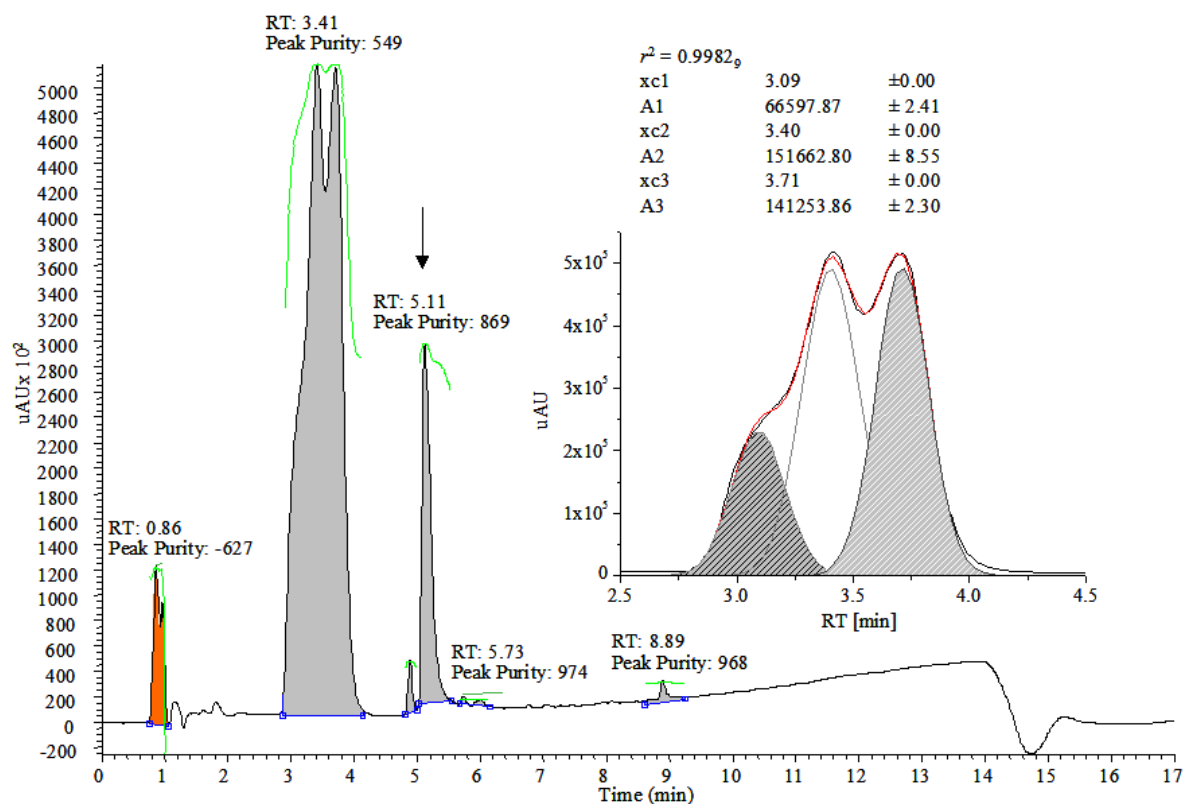

(a)

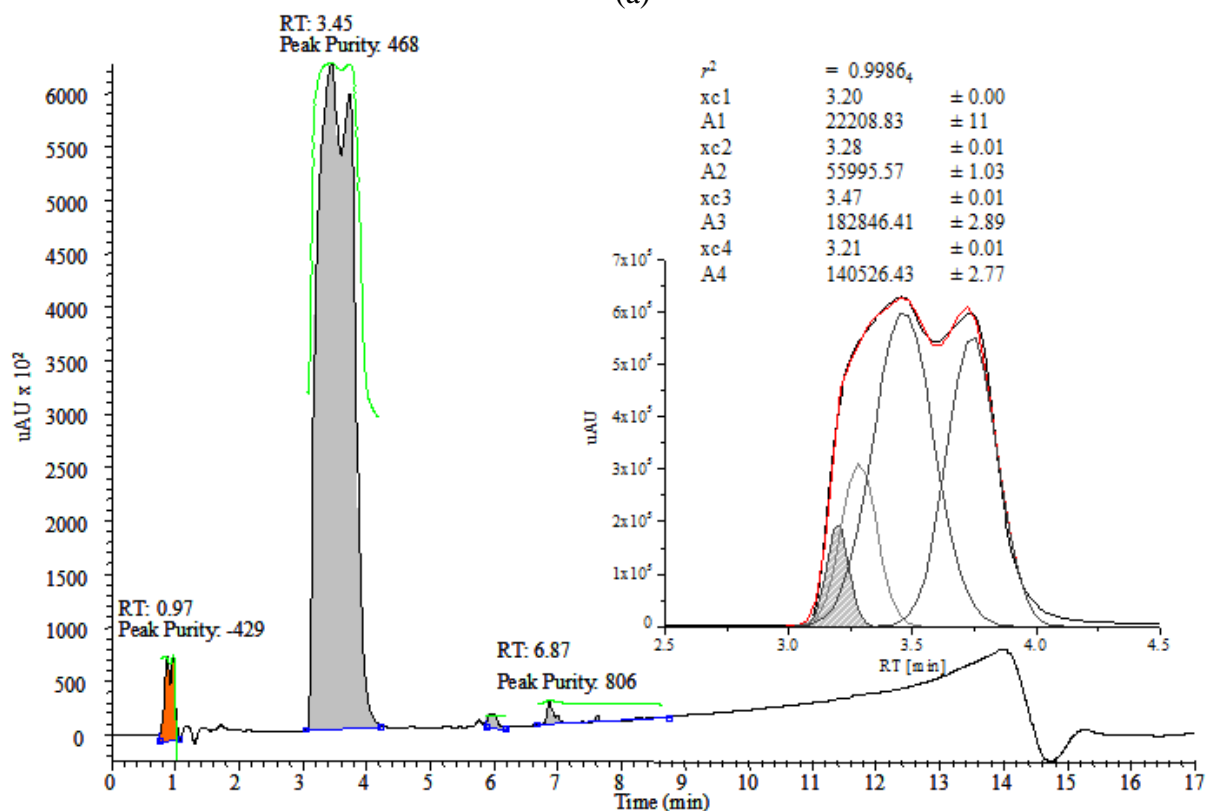

(b)

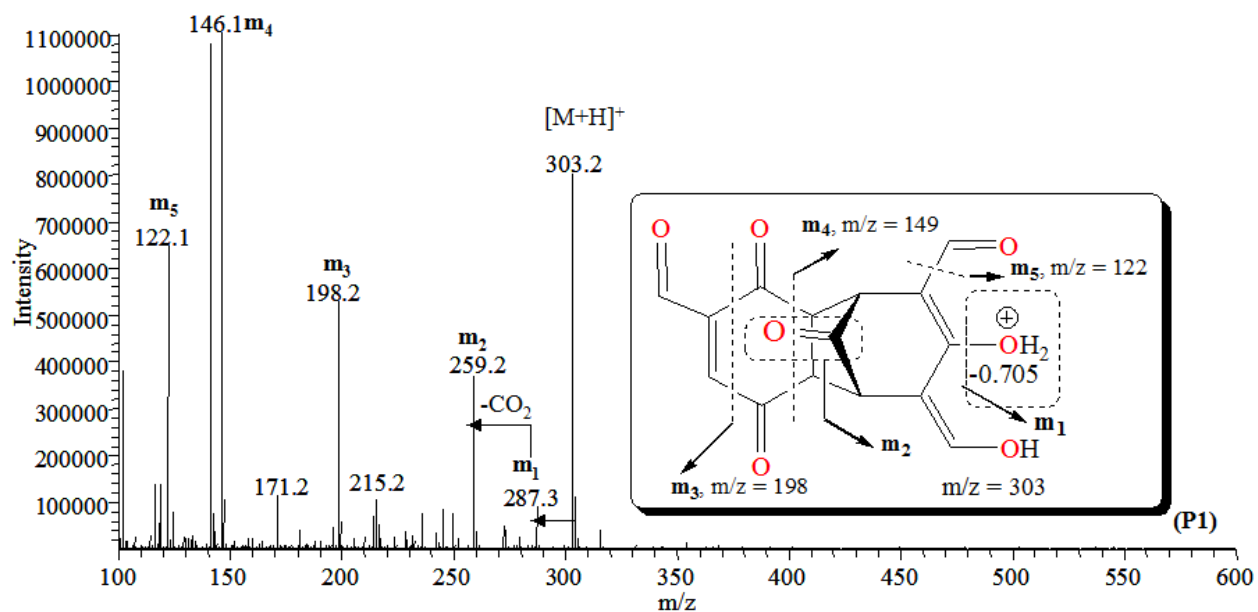

(c)

**Figure S1.** Mass chromatograms of 2,5-dihydroxy benzaldehyde (a) and DHA (b) in solvent mixture acetonitrile:methanol 1:1 at recalculated pH = 8.5; Curve fitted patterns within the retention times 2.5–4.5 min (small figures) according [ref. 7 in the main text]; The chemometric data about the peak positions ( $x_{c_i}$ ) and the integral areas ( $A_i$ ), where  $i = 1-4$ ;  $r^2$ -regression coefficient; ESI-MS spectra of interacion product labeled as P1; Chemical diagram and mass spectrometric fragmentation schemes; The theoretical  $q_0(\text{NBO})$  values, defining the proton accepting positions in the molecular ionic fragments (c).

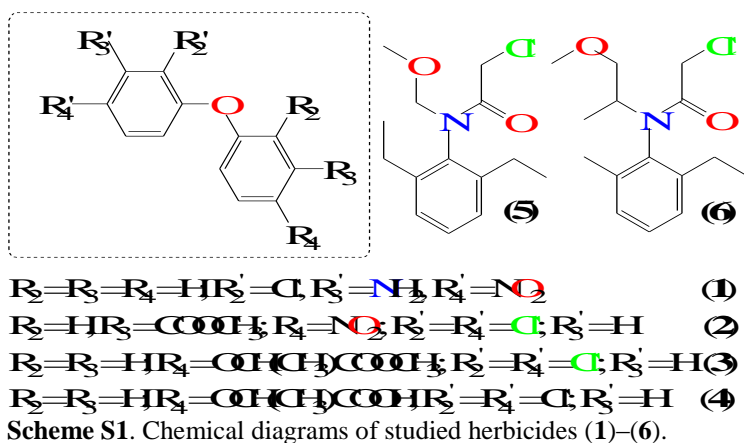

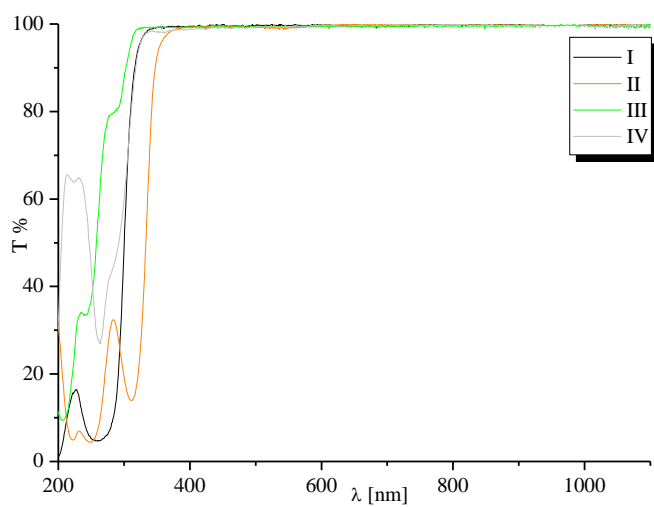

**Figure S2.** Transmission spectra of I–IV

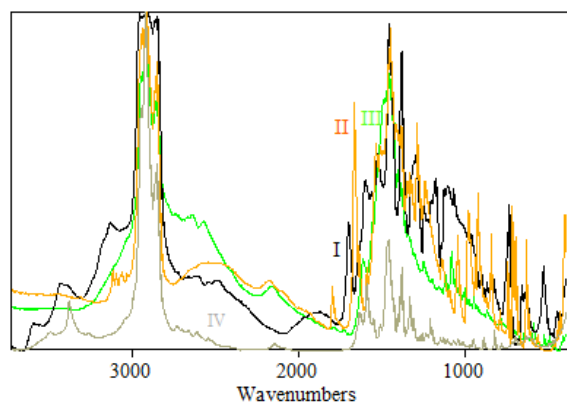

**Figure S3.** IR-spectra in nujol mull of the matrixes I – IV

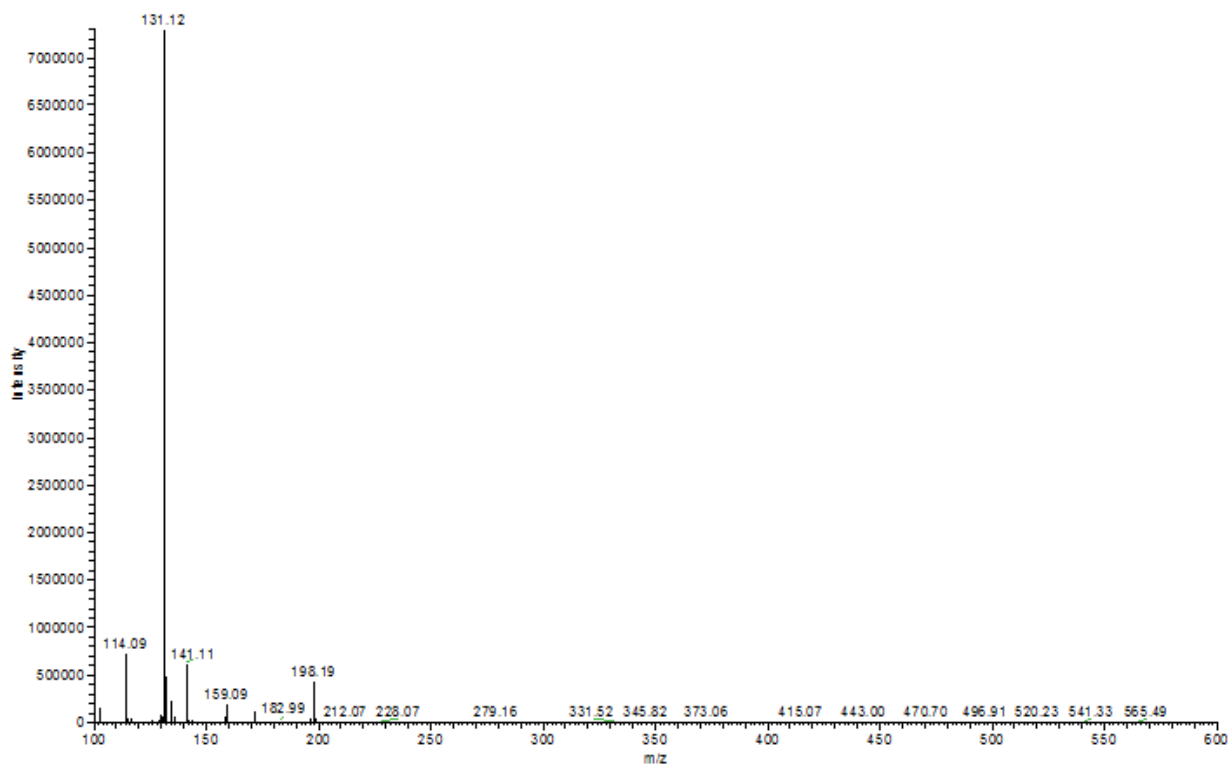

Figure S4. ESI-MS spectrum of **II**

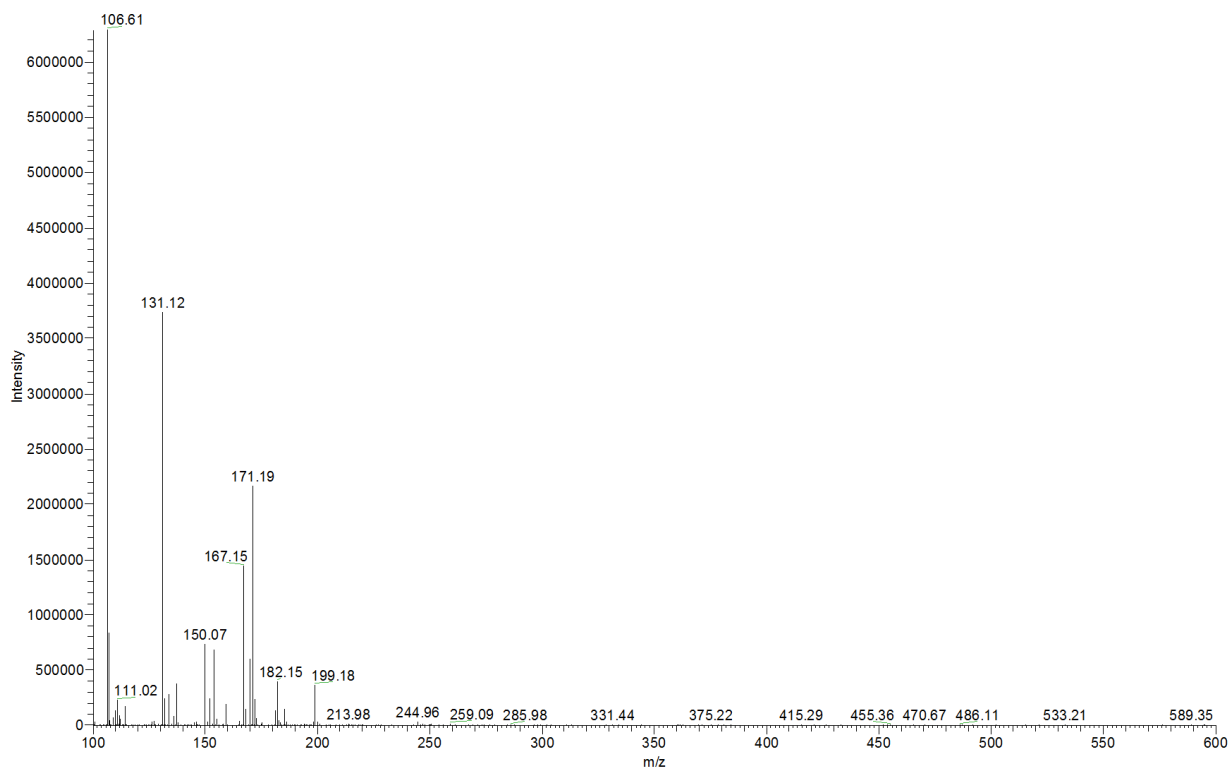

Figure S5. ESI-MS spectrum of isophorone amino nitrimine

**Table S1.** Crystallographic refinement data

|                                                            | (I)                                                           | (III)                                                          | (IV)                                                           |
|------------------------------------------------------------|---------------------------------------------------------------|----------------------------------------------------------------|----------------------------------------------------------------|
| Empirical formula                                          | C <sub>14</sub> H <sub>24</sub> N <sub>2</sub> O <sub>4</sub> | C <sub>12</sub> H <sub>20</sub> N <sub>20</sub> O <sub>6</sub> | C <sub>16</sub> H <sub>20</sub> N <sub>9</sub> O <sub>19</sub> |
| <i>M<sub>r</sub></i>                                       | 430.41                                                        | 288.30                                                         | 498.41                                                         |
| Crystal size                                               | 0.28×0.18×0.13                                                | 0.33×0.28×0.14                                                 | 0.11×0.07×0.04                                                 |
| Crystal system                                             | Orthrhombic                                                   | Monoclinic                                                     | Monoclinic                                                     |
| Space group                                                | P <i>c a</i> 2 <sub>1</sub>                                   | P2 <sub>1</sub> / <i>c</i>                                     | C2/ <i>c</i>                                                   |
| <i>T</i> [K]                                               | 300(2)                                                        | 293(2)                                                         | 300(2)                                                         |
| <i>λ</i> [Å]                                               | 0.71073                                                       | 0.71073                                                        | 0.71073                                                        |
| <i>a</i> [Å]                                               | 13.520(3)                                                     | 8.573(5)                                                       | 26.766(6)                                                      |
| <i>b</i> [Å]                                               | 8.4840(19)                                                    | 8.663(5)                                                       | 11.962(2)                                                      |
| <i>c</i> [Å]                                               | 13.632(3)                                                     | 10.021(5)                                                      | 7.0676(16)                                                     |
| <i>α</i> [°]                                               | 90                                                            | 90                                                             | 90                                                             |
| <i>β</i> [°]                                               | 90                                                            | 121.11(4)                                                      | 100.866(7)                                                     |
| <i>γ</i> [°]                                               | 90                                                            | 90                                                             | 90                                                             |
| <i>V</i> [Å <sup>3</sup> ]                                 | 1563.6(6)                                                     | 637.2(6)                                                       | 2222.2(8)                                                      |
| <i>Z</i>                                                   | 4                                                             | 2                                                              | 4                                                              |
| <i>μ</i> [mm <sup>-1</sup> ]                               | 0.088                                                         | 0.121                                                          | 0.126                                                          |
| <i>ρ</i> <sub>calc</sub> [mg m <sup>-3</sup> ]             | 1.208                                                         | 1.503                                                          | 1.490                                                          |
| 2 <i>θ</i> [°]                                             | 25.14                                                         | 24.25                                                          | 25.06                                                          |
| Reflections collected                                      | 8444                                                          | 5583                                                           | 10169                                                          |
| Goodness-of-fit on <i>F</i> <sup>2</sup>                   | 0.990                                                         | 1.026                                                          | 1.222                                                          |
| <i>R</i> <sub>1</sub> [ <i>I</i> >2 <i>σ</i> ( <i>I</i> )] | 0.0441                                                        | 0.0880                                                         | 0.0866                                                         |

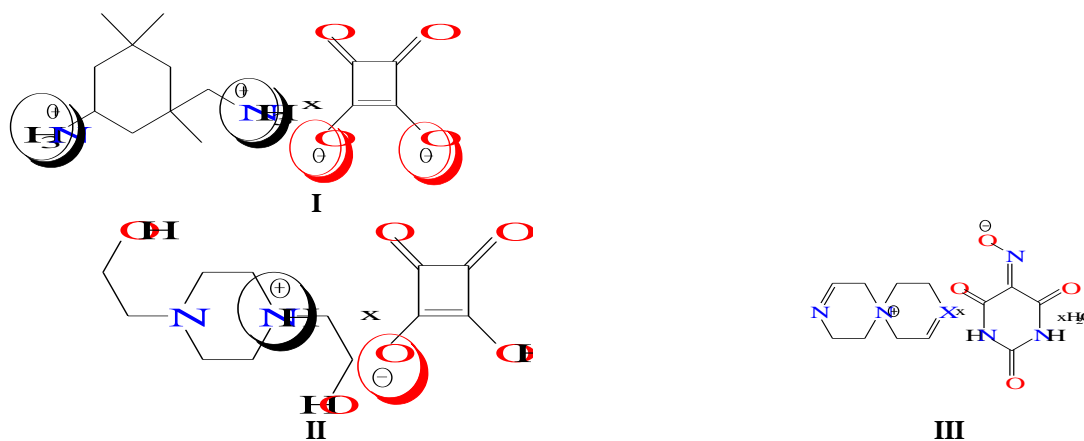

**Scheme S2.** Chemical diagram of the crystals I–III

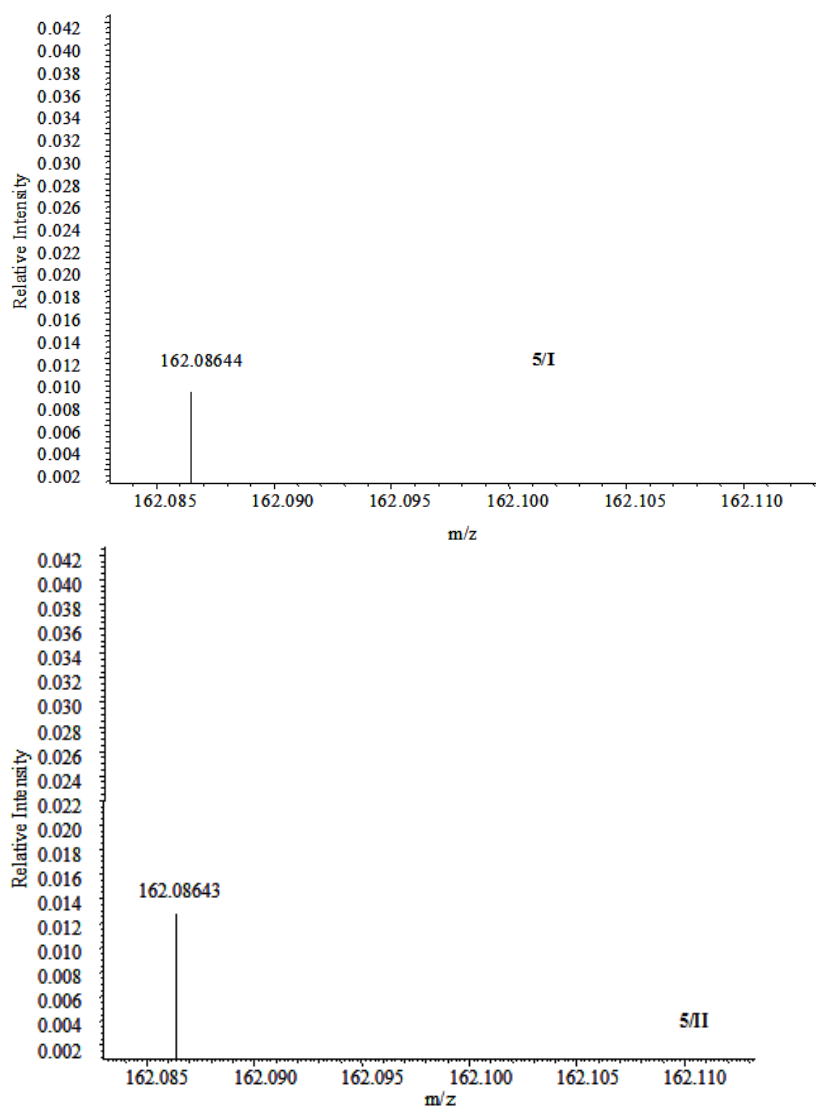

**Figure S6.** UV-MALDI-MS data of **5**, embedded in crystals of **I** and **II**, respectively

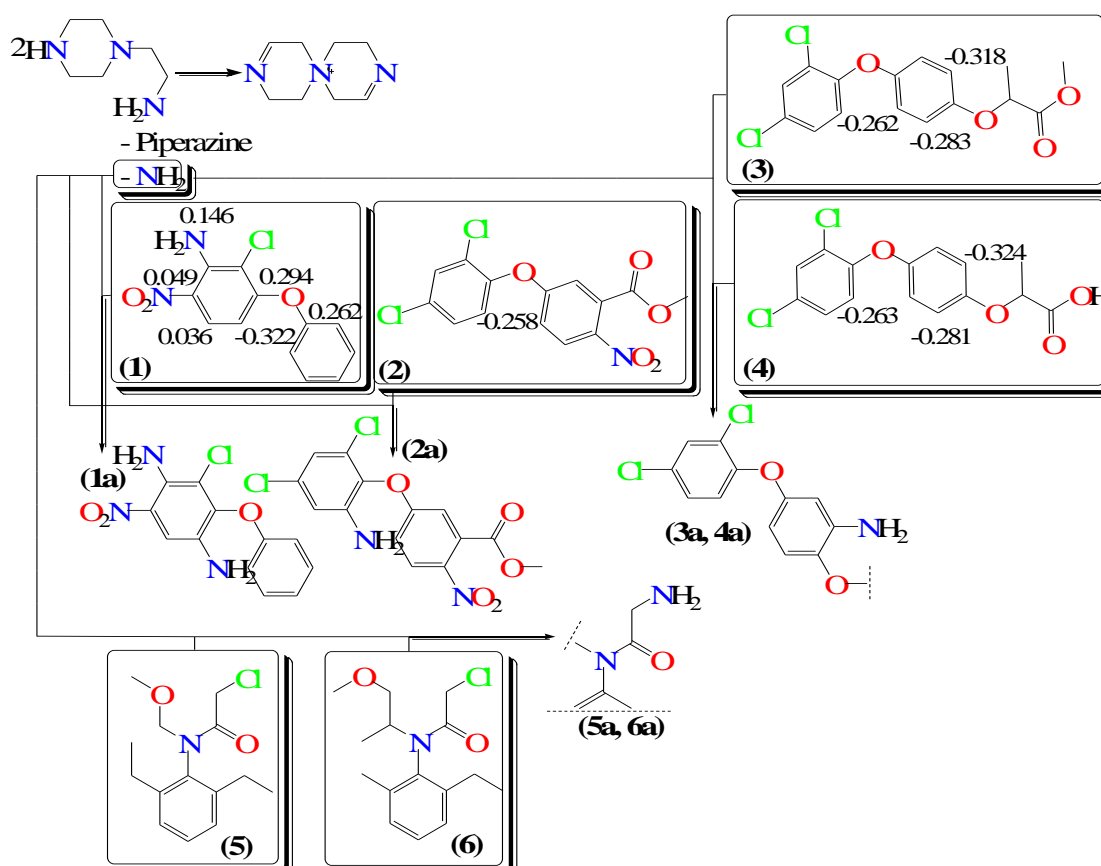

**Scheme S3.** Proposed mechanisms (resp. products of formation) of the formation the chemically modified herbicides under the interaction with the 2-Piperazin-1-yl-ethylamine in the strong acidic medium; The proposed mechanisms of interactions were based on the theoretical NBO analysis evaluated by the shown  $q_X(\text{NBO})$  values, where X = O, N and C. The derivatives 1–4 are described in terms of the  $S_E$  reaction, since ether formed piperazine acted as base yielded the protonated forms in the presence of the acid. In contrast the 5 and 6 yielded the corresponding amines after the dechlorination at the  $S_{N2}$  reaction

## Experimental

### Computational methods

#### Quantum chemical calculations

Quantum chemical GAUSSIAN 09 and Dalton2011 program packages [1a,b] are used. The geometries of the studied herbicides and MS species are optimized employing B3PW91, and M06-2X functional. The calculations of the molecular vibrations are utilized at 6-31+G(d,p), aug-cc-pVDZ and triple- $\zeta$  quality TZVP, triple- $\zeta$  plus double polarization TZ2P basis set, Los Alamos National Laboratory's 2 double- $\zeta$  as well as quasirelativistic effective core pseudo potentials from Stuttgart-Dresden. The UV-VIS spectra are calculated, using TDDFT method at above levels, PCM approach and mixed solvation model [1]. The chemical reactivity and proton accepting ability was evaluated by the NBO analysis [1].



### *Statistical and mathematical methods (Chemometrics)*

The experimental and theoretical spectroscopic data are processed with a view to determine the peak positions and the integral intensities by R4Cal Open Office STATISTICS for Windows 7 program package, according the mathematical procedures and algorithms described in [2]. The statistical significance of each regression coefficient is evaluated by the statistical methods [2].

### **References**

- [1] (a) M. Frisch, et al. Gaussian 09, Gaussian, Inc., Pittsburgh, PA, 2009; (b) Dalton2011 Program Package; <http://www.daltonprogram.org/download.html>; (c) Y. Zhao, D. Truhlar, *Accts Chem. Res.* 2008, **41**, 157; (d) Y. Zhao, D. Truhlar, *Theor. Chem. Acc.* 2008, **120**, 215; (e) S. Grimme, A. Bahlmann, G. Haufe, *Chirality* 2002, **14**, 793; (f) S. Grimme, F. Neese, *J. Chem. Phys.* 2007, **127**, 154116; (g) D. Crawford, *Theor. Chem. Acc.* 2006, **115**, 227; (h) F. de Proft, P. Geerlings, *Chem. Rev.* 2001, **101**, 1451; (i) P. Stephens, D. McCann, J. Cheeseman, M. Frisch, *Chirality* 2005, **17**, S52; (j) P. Stephens, F. Devlin, J. Cheeseman, M. Frisch, O. Bortolini, P. Besse, *Chirality* 2003, **15**, S57; (k) P.vR. Schleyer, P. Schreiner (Eds.-in-Chief), N. Allinger, T. Clark, J. Gasteiger, P. Kollman, H. Schaefer III (Eds.), *Encyclopedia of Computational Chemistry*, Wiley, 1998, Vols. 1–5; (l) B. Ivanova, M. Spiteller, *Nat. Prod. Commun.* 2012, **7**, 157; (m) B. Ivanova, M. Spiteller, *J. Mol. Struct.* 2012, **1012**, 189; (n) B. Ivanova, M. Spiteller, *Biopolymers*, 2012, **97**, 134; (o) B. Ivanova, M. Spiteller, *J. Mol. Struct.* 2012, **1024**, 18
- [2] (a) <http://de.openoffice.org/>; (b) C. Kelley, (1999) *Iterative Methods for Optimization*, SIAM Frontiers in Applied Mathematics, 18; (c) K. Madsen, H. Nielsen, O. Tingleff (2004) *Informatics and Mathematical Modelling*, 2<sup>nd</sup> Ed., DTU Press.
